# Supplementary material
Source: PubMed Central journal article supplement (PMC9704371)

Supplemental Figure 1: Range of exposed concentrations for VOCs. Actual concentrations were measured 2-3 times per exposure after addition of dilution air and prior to reaching the cells. Nominal represents the half-log dilution based off of the analytical measurement of the gas cylinder or dynamic headspace generator. Mean±SEM, n=3.

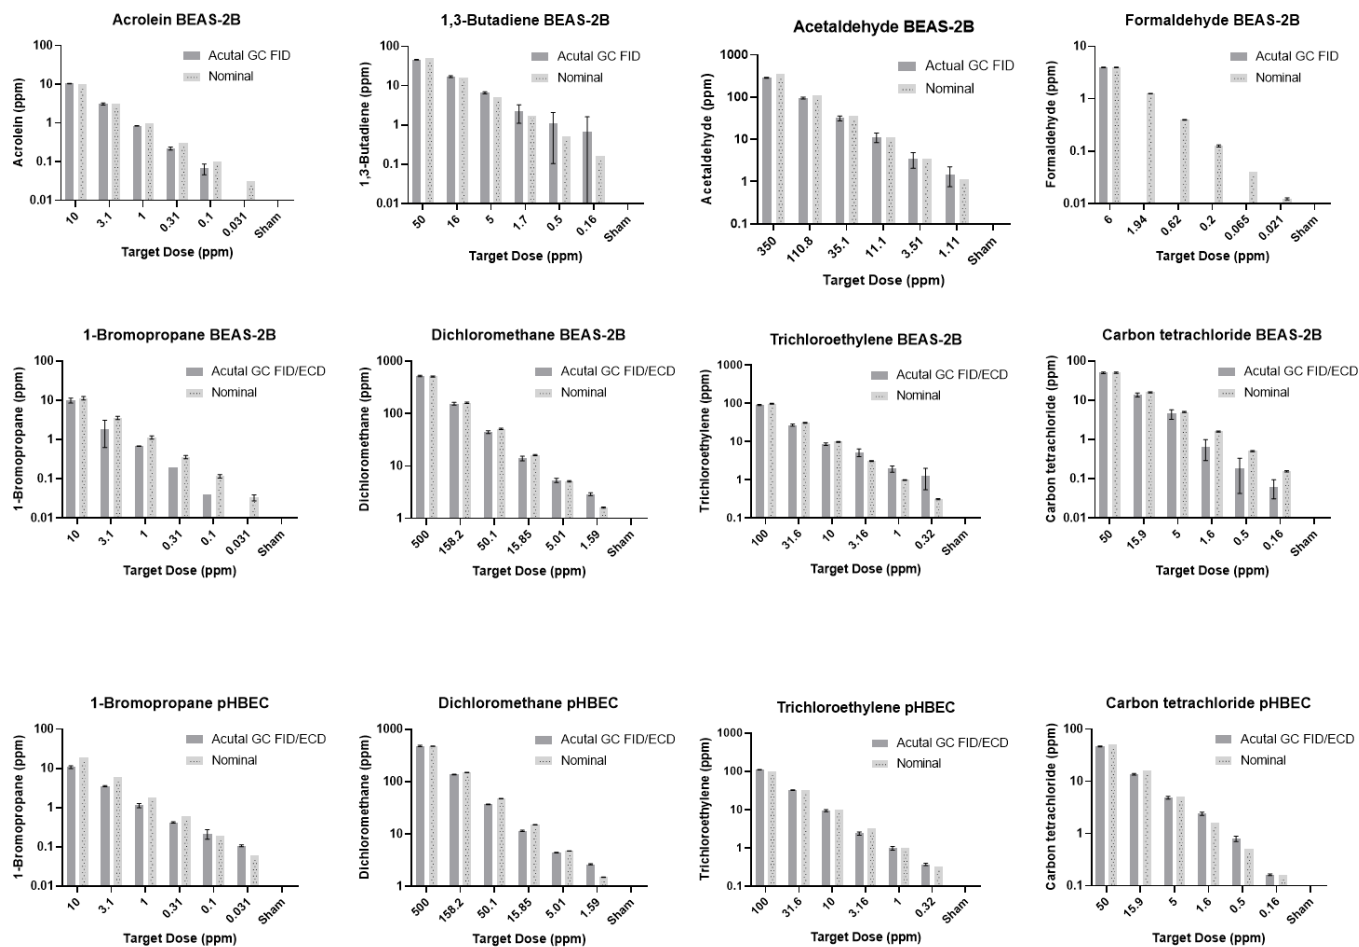

Supplemental Figure 2: Comparison of raw LDH and CellTiter-Glo measurements between the sham exposure and incubator control cells for runs with both BEAS-2B cells and pHBECs. Mean±SEM, n=4, no statistically significant differences observed.

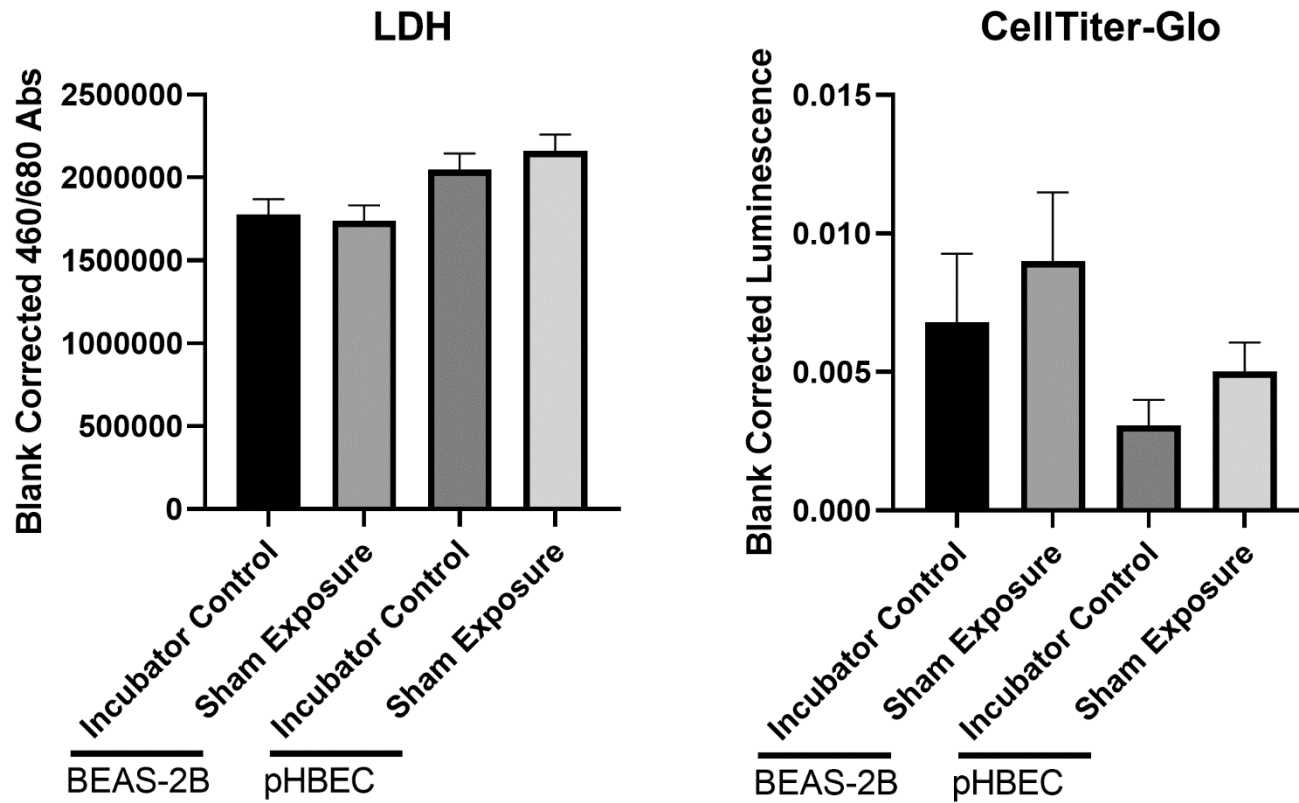

Supplement: NIHMS1836292-supplement-1.pdf [file NIHMS1836292-supplement-1.pdf]
